# Supplementary material for: Rapid reviews methods series: Guidance on team considerations, study selection, data extraction and risk of bias assessment
Source: HighWire-hosted journal article supplement (doi:10.1136/bmjebm-2022-112185), 2023-04-19
Supplement: bmjebm-2022-112185supp001_data_supplement.pdf [file bmjebm-2022-112185supp001_data_supplement.pdf]

## APPENDIX 1:

## Example of an Abstract Review Form on Novel Coronavirus and Quarantine (February 2020)

|                                                                                                                                                                                                                                                                                                                                                                                                                                                      |     |                     |
|------------------------------------------------------------------------------------------------------------------------------------------------------------------------------------------------------------------------------------------------------------------------------------------------------------------------------------------------------------------------------------------------------------------------------------------------------|-----|---------------------|
| <p><b>Is the study a research article?</b></p> <p><b>Note:</b> We exclude books, letters to the editors, commentaries and editorials.</p>                                                                                                                                                                                                                                                                                                            | Yes | No<br><b>STOP!</b>  |
| <p><b>Is the study population of interest for the review?</b></p> <ul style="list-style-type: none"> <li>• <b>Healthy</b> individuals from countries with an epidemic outbreak of nCoV, SARS or MERS</li> <li>• <b>Healthy</b> individuals* who were in contact with a confirmed or probable case of nCoV, SARS or MERS</li> </ul> <p>*excludes health personnel</p> <p><b>Note:</b> We are not interested in the isolation of sick individuals.</p> | Yes | No<br><b>STOP !</b> |
| <p><b>Does the study assess the effectiveness of quarantine?</b></p> <p><b>Note:</b></p> <p>1) We are interested in any form of quarantine (mandatory and voluntary, e.g. voluntary self-isolation); we are not interested in isolation or social distancing.</p> <p>2) Sometimes quarantine is part of the umbrella term 'physical intervention.'</p>                                                                                               | Yes | No<br><b>STOP !</b> |
| <p><b>Is the study design eligible for the review?</b></p> <p><b>Note:</b> We include all designs except case reports.</p>                                                                                                                                                                                                                                                                                                                           | Yes | No<br><b>STOP !</b> |
| <p><b>Should the study be included?</b></p> <p><b>(If you have checked "No" for any of the questions, abstract should be excluded.)</b></p>                                                                                                                                                                                                                                                                                                          | Yes | No                  |

Abbreviations: MERS= Middle East respiratory syndrome, nCoV= novel coronavirus, SARS= severe acute respiratory syndrome

### Definitions

**Quarantine:** Quarantine separates and restricts the movement of people who have been exposed to a contagious disease to see if they become sick. It lasts long enough to ensure the person has not contracted an infectious disease.

**Isolation:** Isolation prevents the spread of an infectious disease by separating people **who are sick** from those who are not. It lasts as long as the disease is contagious.

**Social distancing:** Social distancing is a way to keep people from interacting closely or frequently enough to spread an infectious disease. Schools and other gathering places such as movie theatres may close, and sports events and religious services may be cancelled.
