# Supplementary material for: Rapid reviews methods series: Guidance on team considerations, study selection, data extraction and risk of bias assessment
Source: PubMed Central journal article supplement — BMJ Evid Based Med. 2023 Apr 19;28(6):418–23. doi: 10.1136/bmjebm-2022-112185 (PMC10715469; doi:10.1136/bmjebm-2022-112185), 2023-04-19
Supplement: bmjebm-2022-112185supp002.pdf [file bmjebm-2022-112185supp002.pdf]

## APPENDIX 2: Data fields commonly extracted

### Study level characteristics

- Last name of first author and year of publication
- Country(ies) where the study was conducted
- Study design (e.g. RCT, cohort, case-control)
- Study duration
- Funding

### Participant demographics

- Sex/gender (e.g. percentage of female participants)
- Age, as reported (e.g. Mean [SD], Median [Range])
- Ethnicity
- Co-morbidities

### Outcome data

- Outcome 1 (definition of outcome and how it was measured): specific result (time point)
- Outcome 2 (definition of outcome and how it was measured): specific result (time point)
- Etc.
