# Supplementary material for: Rapid reviews methods series: Guidance on team considerations, study selection, data extraction and risk of bias assessment
Source: HighWire-hosted journal article supplement (doi:10.1136/bmjebm-2022-112185), 2023-04-19
Supplement: bmjebm-2022-112185supp002_data_supplement.pdf [file bmjebm-2022-112185supp002_data_supplement.pdf]

## APPENDIX 2: Data fields commonly extracted

### Study level characteristics

- Last name of first author and year of publication
- Country(ies) where the study was conducted
- Study design (e.g. RCT, cohort, case-control)
- Study duration
- Funding

### Participant demographics

- Sex/gender (e.g. percentage of female participants)
- Age, as reported (e.g. Mean [SD], Median [Range])
- Ethnicity
- Co-morbidities

### Outcome data

- Outcome 1 (definition of outcome and how it was measured): specific result (time point)
- Outcome 2 (definition of outcome and how it was measured): specific result (time point)
- Etc.
